# Supplementary material for: Overexpression of microRNA-9 enhances cisplatin sensitivity in hepatocellular carcinoma by regulating EIF5A2-mediated epithelial-mesenchymal transition
Source: PubMed Central journal article supplement (PMC7019138; doi:10.7150/ijbs.32460), 2020-01-16
Supplement: ijbsv16p0827s1.pdf [file ijbsv16p0827s1.pdf]

# **Overexpression of microRNA-9 enhances cisplatin sensitivity in hepatocellular carcinoma by regulating EIF5A2-mediated epithelial–mesenchymal transition**

Ying BAO<sup>1\*</sup>, Yibo ZHANG<sup>2\*</sup>, Yongliang LU<sup>3\*</sup>, Huihui GUO<sup>1\*</sup>, Zhaohuo DONG<sup>1</sup>,  
Qiuqiang CHEN<sup>1</sup>, Xilin ZHANG<sup>1</sup>, Weiyun SHEN<sup>1</sup>, Wei CHEN<sup>4</sup>, Xiang WANG<sup>1</sup>

<sup>1</sup>Key Laboratory for Translational Medicine, First Affiliated Hospital, Huzhou University, the First People's Hospital of Huzhou, huzhou 313000, China

<sup>2</sup>Department of Hepatobiliary and Pancreatic Surgery, Second Affiliated Hospital of Zhejiang University School of Medicine, Hangzhou, 310009, China

<sup>3</sup>Department of medicine, Huzhou University, huzhou 313000, China

<sup>4</sup>Institute of Molecular Engineering, University of Chicago, Chicago, 60637, USA.

\* Contributed equally to this work

## **Address corresponding to:**

Xiang WANG, First Affiliated Hospital, Huzhou University, the First People's Hospital of Huzhou, huzhou 313000, China .

Tel: +86572-2023728; Fax: +86572-2023728.

E-mail address: wangx2017@126.com

Wei Chen, Institute of Molecular Engineering, University of Chicago, Chicago, 60637, USA

Tel: +1 8722128084; Fax+1 7737027752

E-mail address: weichen@uchicago.edu

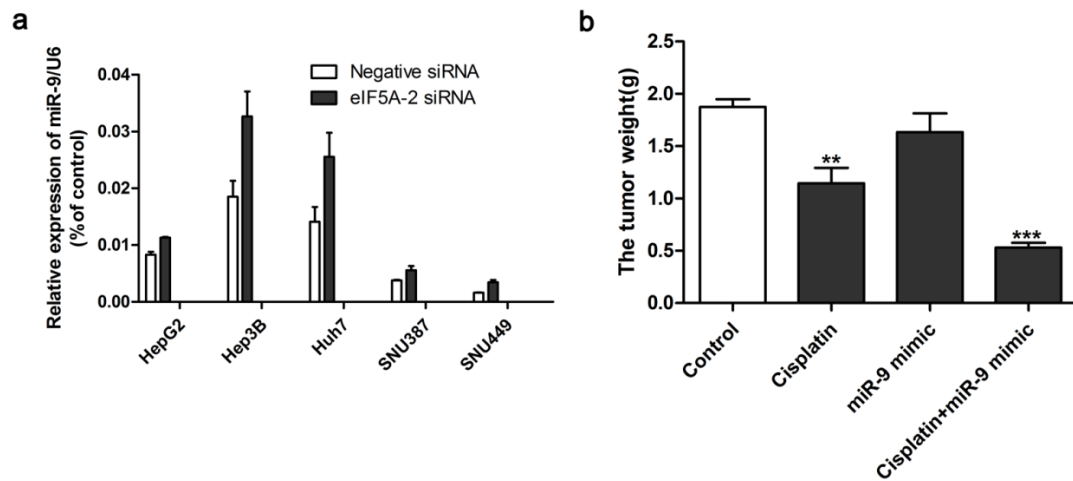

**Figure S1**

- a.** Real-time PCR was determined to detect the level of miR-9 after EIF5A2 knockdown or not. **b.** Tumor weight of xenograft tumors treated with control, cisplatin, miR-9 mimic, or cisplatin plus miR-9 mimic (n = 4 per group). \*\*P < 0.01, \*\*\*P < 0.001 vs Control.

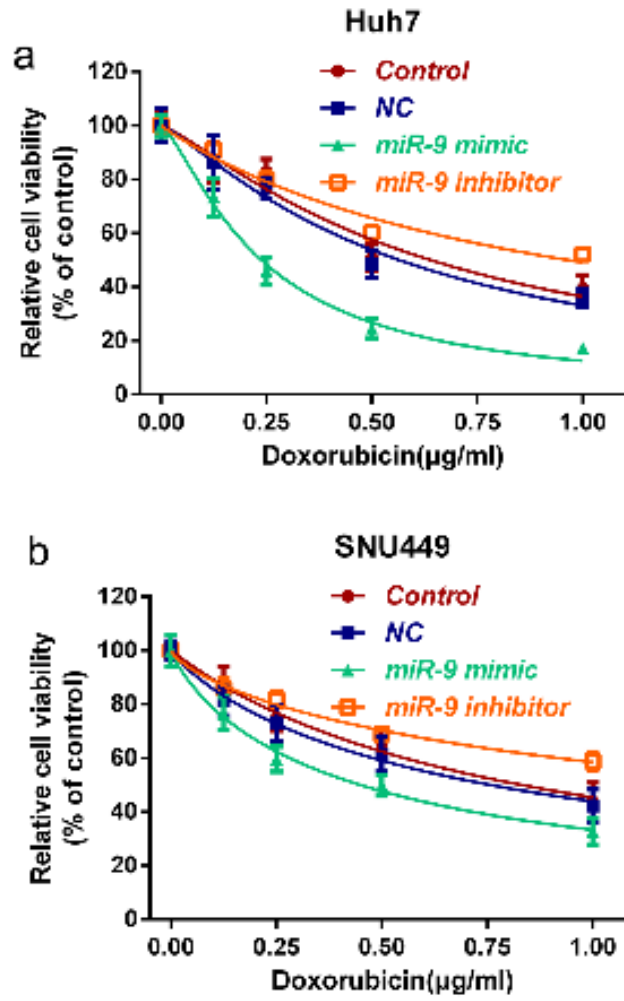

**Figure S2**

**a-b.** CCK-8 determined the sensitivity to doxorubicin after transfected with miR-9 mimic, inhibitor, control or NC in HCC cells.

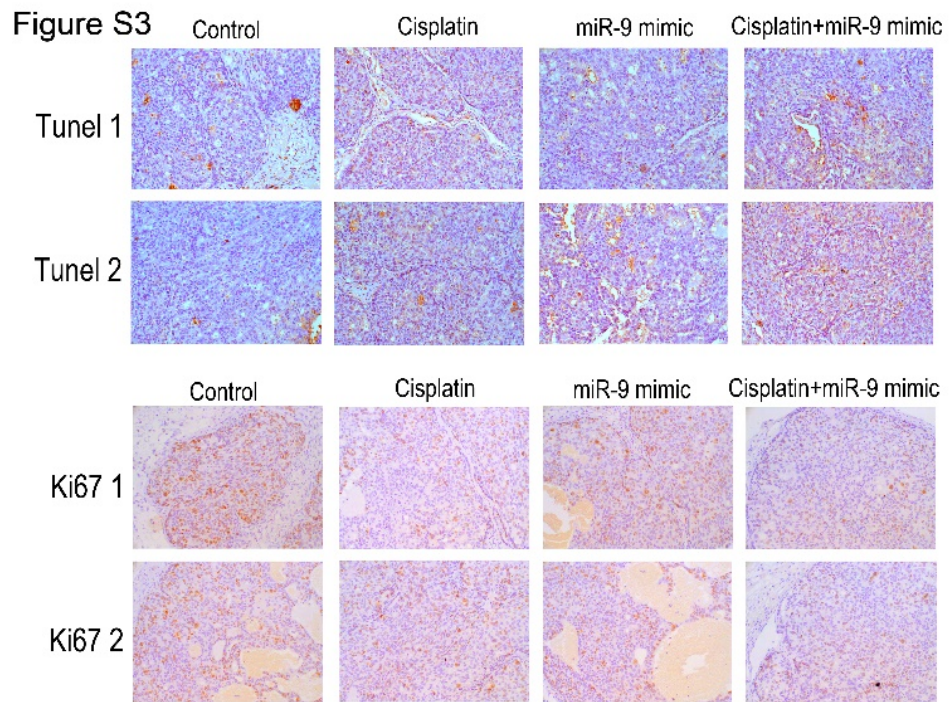

**Figure S3**

TUNEL of apoptosis in the treatment groups and Ki-67 staining in the treatment groups and rate of Ki-67 positive staining.
